# Supplementary material for: Direct comparison of a covalently-linked dyad and a 1 : 1 mixture of tetrabenzoporphyrin and fullerene as organic photovoltaic materials
Source: Royal Society of Chemistry journal article supplement (doi:10.1039/c4cc03801k), 2014-06-17
Supplement: c4cc03801k1.pdf [file c4cc03801k1.pdf]

Supporting Information

**Direct comparison of covalently-linked dyad and a 1:1 mixture of tetrabenzoporphyrin and fullerene as organic photovoltaic materials**

Yuto Tamura,<sup>a</sup> Hiroyuki Saei,<sup>a</sup> Junpei Hashizume<sup>b</sup> Yukinori Okazaki,<sup>b</sup> Mitsuharu Suzuki,<sup>a</sup>  
Daiki Kuzuhara,<sup>a</sup> Naoki Aratani<sup>a</sup> and Hiroko Yamada<sup>\*ac</sup>

<sup>a</sup>Graduate School of Materials Science, Nara Institute of Science and Technology, 8916-5,  
Takayama-cho, Ikoma 630-0192, Japan, Fax: +81-743-72-6042; Tel: +81-743-72-6041;

<sup>b</sup>Graduate School of Science and Engineering, Ehime University, 2-5 Bunkyo-cho, Matsuyama,  
790-8577, Japan;

<sup>c</sup>CREST, JST, 4-1-8 Honcho, Kawaguchi, Saitama 332-0012, Japan;

Corresponding author E-mail: hyamada@ms.naist.jp

**Contents**

**Experimental conditions**

1. General
2. Materials
3. Cyclic voltammetry
4. Device fabrication and evaluation.
5. Film characterization.

**Experimental section**

1. Synthesis
2. Thermal reaction profiles
3. UV-vis absorption spectrum and fluorescence spectra
4. Ionization potential
5. Cyclic voltammetry
6. Current–voltage measurement
7. AFM
8. XRD
9. Characterization of compounds

**Reference**

## Experimental conditions

### 1. General

$^1\text{H}$  NMR and  $^{13}\text{C}$  NMR spectra were recorded on a JEOL JNM-ECX400 and AL 300 spectrometers at ambient temperature using tetramethylsilane as an internal standard. ESI and MALDI-TOF mass spectra were measured on a JEOL JMS-T100LC AccuTOF spectrometer and JEOL spiral TOF JMS-S3000 spectrometer, respectively. UV-vis spectra were measured on a JASCO UV/VIS/NIR Spectro-photometer V-570. Steady-state fluorescence spectra were measured on JASCO FP-6600 in the range of 400–800 nm. Fluorescence quantum yields were measured on an Absolute PL Quantum Yield Measurement System C9920-02. Thermogravimetric analysis were performed on a Seiko Thermal Analyser Exstar TG/DTA 6200.

### 2. Materials

Solvents and chemicals were reagent grade quality, obtained commercially and used without further purification except as noted. Thin-layer chromatography (TLC) and gravity column chromatography were performed on Art. 5554 (Merck KGaA), and Silica Gel 60N (Kanto Chemical Co.), respectively. For spectral measurements, spectral grade  $\text{CH}_2\text{Cl}_2$  were purchased from Nacalai tesque Inc.

### 3. Cyclic voltammetry

CV measurements were conducted in a solution of 0.1 M TBAPF<sub>6</sub> in dry benzonitrile with a scan rate of 100 mV/s at room temperature in an argon-filled cell. A glassy carbon electrode and a Pt wire were used as a working and a counter electrode, respectively. An Ag/Ag<sup>+</sup> electrode was used as a reference electrode, which was normalized with the half-wave potential of ferrocene/ferrocenium<sup>+</sup> (Fc/Fc<sup>+</sup>) redox couple.

### 4. Device fabrication and evaluation.

Indium-tin-oxide (ITO)-patterned glass substrates (20.0 × 25.0 mm, 15  $\Omega$  per square) were washed with running water and were ultrasonically cleaned in detergent, pure-water and isopropanol for 10 min each. After the substrates were dried, (3,4-ethylenedioxythiophene):poly(4-styrenesulfonate) (PEDOT:PSS, Clevios P VP AI4083, 200  $\mu\text{L}$ ) was spin coated at 3000 rpm for 30 s in air followed by a thermal annealing treatment at 130 °C for 10 min in air. The thickness of the resulting PEDOT:PSS layer was about 30 nm. The substrates were transferred to a N<sub>2</sub>-filled glove box (<10 ppm O<sub>2</sub> and H<sub>2</sub>O).

The deposition process of organic active layers is illustrated in Fig. S1. The p-layer was prepared by spin-coating of a chloroform solution (0.5 wt%, 100  $\mu$ L, 2500 rpm, 30 s) of CP followed by heating (200  $^{\circ}$ C, 20 min) to effect the in-situ conversion of CP to BP. The i (BHJ) layer for D–A compound was deposited in the similar manner with CP–C<sub>60</sub> (0.7 wt%, 100  $\mu$ L, 1500 rpm, 30 s) and heated (160  $^{\circ}$ C, 20 min). For the reference i-layer, a mixed solution of CP and PCBM was spin-coated (0.7 wt%, 100  $\mu$ L, 1500 rpm, 30 s) and heated (160  $^{\circ}$ C, 20 min). The n-layer was prepared by spin-coating of a chloroform solution of PC<sub>61</sub>BM (0.5 wt%, 100  $\mu$ L, 1500 rpm, 30 s) and annealed (195  $^{\circ}$ C, 20 min). After preparation of the organic layers, aluminum (80 nm) was vapor deposited at high vacuum ( $5.0 \times 10^{-5}$  Pa) through a shadow mask that defined an active area to 4.0 mm<sup>2</sup>.

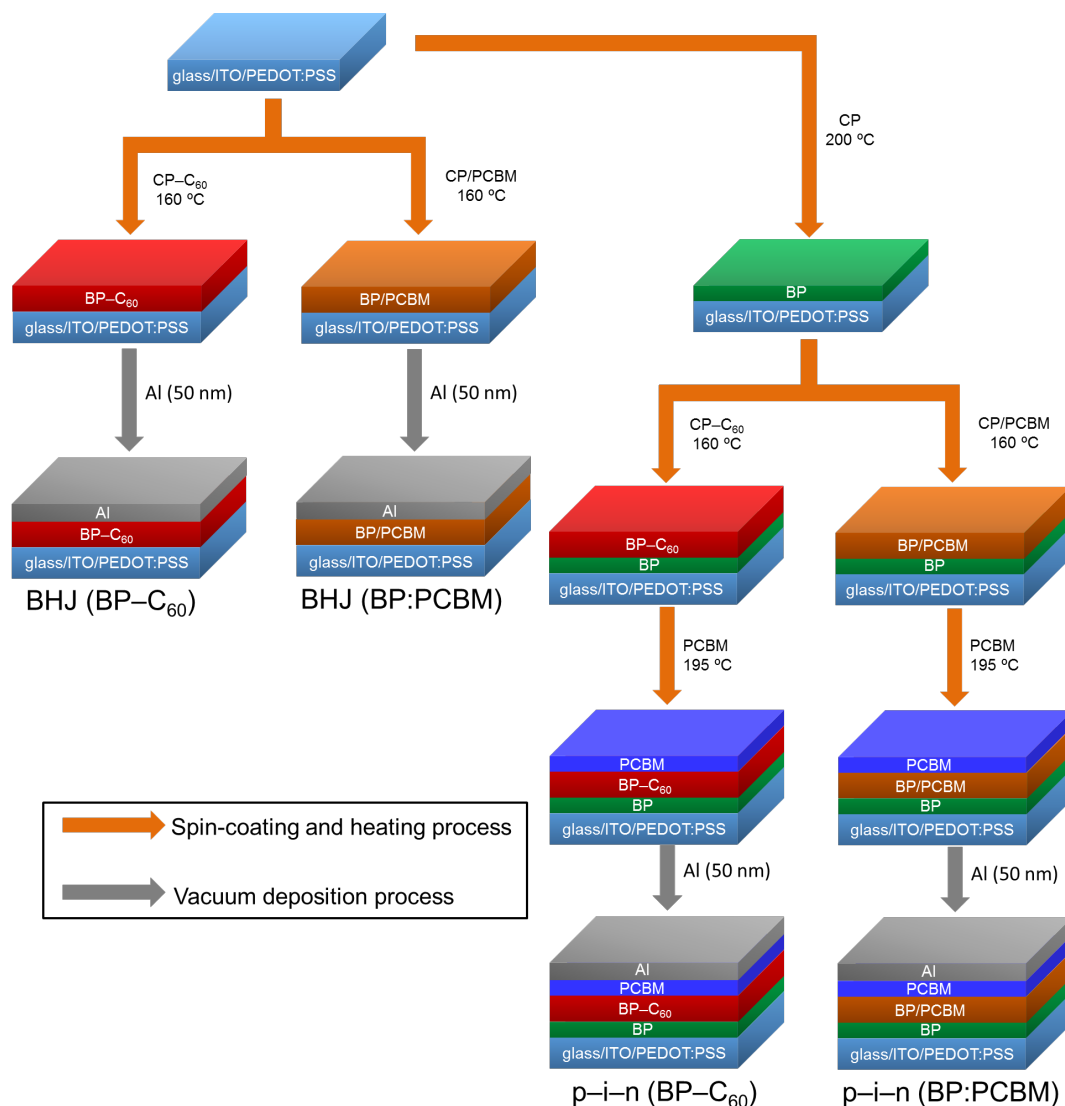

**Fig. S1** Schematic description of fabrication procedure of the four different types of OPVs studied in this work. Typical concentration of the spin-coating solution is described.

Current–voltage ( $J$ – $V$ ) curves were measured using a Keithley 2611B SYSTEM Source Meter unit under AM1.5G illumination at an intensity of  $100 \text{ mW cm}^{-2}$  using a solar simulator (Bunko-keiki, CEP-2000RP). The external quantum efficiency (EQE) spectra were obtained under illumination of monochromatic light using the same system. The series resistance ( $R_s$ ) and shunt resistance ( $R_{sh}$ ) were obtained from light  $J$ – $V$  curves.

### **5. Film characterization.**

The film was prepared as described above on clean ITO glass without PEDOT:PSS. The surface morphology of organic films was observed by SPA400, SPI3800N AFM (Seiko instruments Inc.) in tapping mode using silicon probes with a resonant frequency of  $\sim 138 \text{ kHz}$  and a force constant of  $16 \text{ N m}^{-1}$ . The bulk structure of thin-films was evaluated by out-of-plane X-ray diffraction (XRD) measurements using a RINT-TTRIII/NM diffractometer equipped with a rotating anode (Cu  $K\alpha$  radiation,  $\lambda = 1.5418 \text{ \AA}$ ). Ionization potential of the films was measured by a Riken photoelectron spectroscopy instrument, AC-3.

## Experimental section

### 1. Synthesis

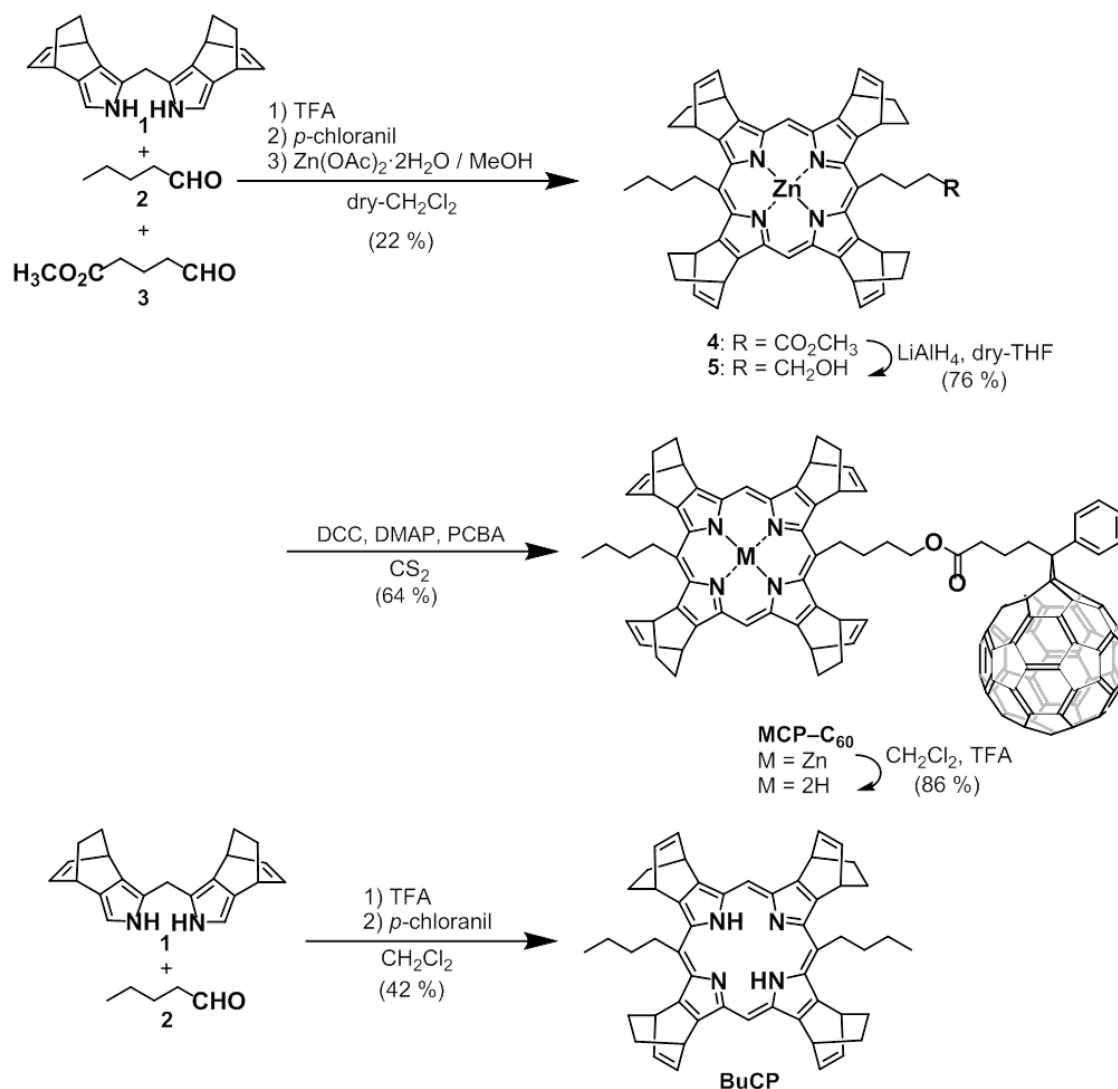

**Scheme S1** Synthesis route of **CP-C<sub>60</sub>** and **BuCP**

**Porphyrin S4:** **S1**<sup>1</sup> (1.04 g, 3.46 mmol), **S2** (86 mg, 1.04 mmol), and **S3**<sup>2</sup> (320 mg, 2.42 mmol) and dry- $\text{CH}_2\text{Cl}_2$  (600 mL) were added to a 1-L three-necked round-bottom flask under Ar. TFA (19  $\mu\text{m}$ ) was added to the solution, and the solution was stirred at room temperature for 16 h. After the addition of tetrachloro-*p*-benzoquinone (1.41 g, 5.75 mmol), the solution was stirred at room temperature for 2.5 h and was neutralized with triethylamine (1 mL). The solution was concentrated to 100 mL, and  $\text{Zn}(\text{OAc})_2 \cdot 2\text{H}_2\text{O}$  (380 mg, 2.07 mmol) in methanol was added to the solution. The solution was stirred at room temperature for 3 h. The solvent was removed by evaporation and the crude product was purified by silica gel column chromatography with ethyl

acetate/hexane (1:6) as an eluent to afford the purple powder **S4** (320 mg, 22%).

$^1\text{H}$  NMR ( $\text{CDCl}_3$ , 400 MHz),  $\delta$ : 10.15–10.33 (m, 2H), 7.06–7.23 (m, 8H), 5.06–5.85 (8H), 5.13–5.53 (m, 4H), 3.28–3.90 (m, 2H), 2.59–3.28 (m, 4H), 1.77–2.32 (m, 18H), 1.24–1.41 (m, 3H).

$^{13}\text{C}$  NMR ( $\text{CDCl}_3$ , 100 MHz),  $\delta$ : 173.92, 173.86, 151.46, 151.34, 148.02, 147.65, 143.87, 143.77, 140.50, 136.98, 120.40, 120.23, 118.35, 118.16, 96.61, 95.87, 52.12, 51.75, 41.38, 41.20, 40.92, 40.05, 36.00, 34.57, 33.87, 33.66, 33.37, 33.00, 32.61, 28.16, 27.66, 27.58, 27.46, 27.07, 23.81, 14.83, 14.69.

HR-MS (ESI): calcd for  $\text{C}_{53}\text{H}_{53}\text{N}_4\text{O}_2\text{Zn}$ , 841.3460  $[\text{M} + \text{H}]^+$ ; found, 841.3454.

**Porphyrin S5:** Porphyrin **S4** (400 mg, 0.48 mmol) and dry-THF (12 mL) were added to a 50-mL two-necked round-bottom flask under  $\text{N}_2$ .  $\text{LiAlH}_4$  (36 mg, 0.96 mmol) was added to the solution slowly, and stirred at room temperature for 12 h. A saturated aqueous solution of potassium sodium tartrate was added and the organic layer was extracted with ethyl acetate and washed with water and brine. The organic layer was dried over  $\text{Na}_2\text{SO}_4$  and the solvent was removed by evaporation and the crude product was purified by silica gel column chromatography with ethyl acetate/hexanes (1:4) as an eluent and recrystallization from  $\text{CHCl}_3$ /hexanes to afford the pink powder **S5** (220 mg, 72%).

$^1\text{H}$  NMR ( $\text{CDCl}_3$ , 400 MHz),  $\delta$ : 10.14 (s, 2H), 7.04–7.22 (m, 8H), 5.69–5.82 (m, 8H), 5.17–5.47 (m, 4H), 3.79–4.04 (m, 2H), 2.64–3.06 (m, 4H), 1.80–2.51 (m, 20H), 1.22–1.46 (m, 4H).

$^{13}\text{C}$  NMR ( $\text{CDCl}_3$ , 100 MHz),  $\delta$ : 151.34, 151.33, 148.01, 147.75, 143.90, 143.78, 140.58, 140.51, 137.21, 137.15, 137.06, 120.26, 119.51, 119.37, 96.62, 96.54, 63.11, 40.96, 36.04, 34.53, 33.48, 31.60, 28.30, 28.27, 28.22, 28.18, 27.69, 27.66, 27.61, 27.59, 27.55, 27.51, 27.47, 27.11, 23.85, 22.66, 14.86, 14.14.

HR-MS (ESI): calcd for  $\text{C}_{52}\text{H}_{53}\text{N}_4\text{O}_2\text{Zn}$ , 813.3511  $[\text{M} + \text{H}]^+$ ; found, 813.3509.

**ZnCP-C<sub>60</sub>:** Porphyrin **S5** (250 mg, 0.31 mmol), PCBA<sup>3</sup> (330 mg, 0.37 mmol), *N,N*-dicyclohexylcarbodiimide (DCC) (95 mg, 0.47 mmol), *N,N*-dimethyl-4-aminopyridine (DMAP) (4 mg, 0.03 mmol), and  $\text{CS}_2$  (5 mL) were added to a 20-mL round-bottom flask. The reaction mixture was stirred at room temperature for 48 h. The solvent was removed by evaporation and the residue was purified by silica gel column chromatography with  $\text{CH}_2\text{Cl}_2$  as an eluent and by GPC with  $\text{CHCl}_3$  as eluent to afford the dark purple solid **ZnCP-C<sub>60</sub>** (338 mg, 64%).

$^1\text{H}$  NMR ( $\text{CDCl}_3$ , 400 MHz):  $\delta$ : 10.06–10.23 (m, 2H), 7.32–7.68 (m, 5H), 6.94–7.24 (m, 8H), 5.60–5.86 (m, 8H), 5.16–5.54 (m, 4H), 4.25–4.45 (m, 2H), 1.56–3.00 (m, 30H), 1.29–1.45 (m, 3H).

$^{13}\text{C}$  NMR ( $\text{CDCl}_3$ , 100 MHz),  $\delta$ : 173.40, 173.26, 151.44–150.80,\* 148.13–135.65,\* 131.86, 131.75, 128.06, 127.93, 120.81, 120.61, 119.42, 119.37, 96.83, 96.70, 78.56, 78.35, 78.22, 78.18, 78.15, 65.67, 65.19, 65.07, 50.34, 41.13, 36.02, 35.97, 35.76, 34.16, 33.76, 32.84, 32.62, 32.41, 29.41, 28.78, 28.75, 28.53, 28.35, 27.73, 27.57, 27.41, 27.36, 23.78, 22.43, 14.96.

\*Overlapped broad peaks are observed presumably owing to intra or intermolecular interactions between the  $\text{C}_{60}$  core and the porphyrin unit, associated with the existence of multiple isomers depending on the orientation of bicyclo[2.2.2]octadieno-units.

HR-MS (ESI): calcd for  $\text{C}_{123}\text{H}_{63}\text{N}_4\text{O}_2\text{Zn}$ , 1691.4243  $[\text{M} + \text{H}]^+$ ; found, 1691.4253.

**CP-C<sub>60</sub>**: **ZnCP-C<sub>60</sub>** (300 mg, 0.18 mmol) and  $\text{CH}_2\text{Cl}_2$  (25 mL) was added to a 50-mL round-bottom flask. TFA (67  $\mu\text{L}$ , 0.88 mmol) was added to the solution, and stirred overnight at room temperature. The solution was washed with a saturated aqueous solution of  $\text{NaHCO}_3$ , water, and brine. The solvent was removed by evaporation and the crude product was purified by GPC with  $\text{CHCl}_3$  as an eluent to afford the dark purple solid **CP-C<sub>60</sub>** (260 mg, 89%).

$^1\text{H}$  NMR ( $\text{CDCl}_3$ , 400 MHz),  $\delta$ : 10.12–10.26 (m, 2H), 7.31–7.67 (m, 5H), 6.93–7.24 (m, 8H), 5.56–5.87 (m, 8H), 5.05–5.44 (m, 4H), 4.25–4.46 (m, 2H), 1.58–2.90 (m, 30H), 1.23–1.43 (m, 3H), -3.43–3.11 (m, 2H).

$^{13}\text{C}$  NMR ( $\text{CDCl}_3$ , 100 MHz),  $\delta$ : 173.43, 173.28, 151.46–150.83,\* 146.20–135.68,\* 131.89, 131.79, 128.07, 127.97, 127.90, 119.76, 119.68, 119.63, 118.24, 118.14, 96.41, 96.14, 78.60, 78.40, 78.27, 65.64, 65.26, 65.15, 64.43, 50.24, 40.68, 40.20, 40.12, 36.06, 35.55, 35.37, 34.32, 33.28, 33.13, 32.93, 32.73, 32.58, 29.62, 29.58, 28.57, 28.39, 27.65, 27.49, 25.34, 23.85, 22.42, 22.28, 14.82. \*Overlapped broad peaks are observed presumably owing to intra or intermolecular interactions between the  $\text{C}_{60}$  core and the porphyrin unit, associated with the existence of multiple isomers depending on the orientation of bicyclo[2.2.2]octadieno-units.

HR-MS (ESI): calcd for  $\text{C}_{123}\text{H}_{65}\text{N}_4\text{O}_2$ , 1629.5108  $[\text{M} + \text{H}]^+$ ; found, 1629.5094.

**BuCP**: **S1** (1.04 g, 3.46 mmol), **S2** (286 mg, 3.46 mmol) and dry- $\text{CH}_2\text{Cl}_2$  (600 mL) were added to a 1-L three-neck round-bottom flask under Ar. TFA (19  $\mu\text{L}$ ) was added and the solution was stirred at room temperature for 16 h. After the addition of tetrachloro-*p*-benzoquinone (1.41 g, 5.75 mmol), the solution was stirred at room temperature for 2.5 h and neutralized with

triethylamine (1 mL). The solvent was removed by evaporation and the crude product was purified by silica gel column chromatography with ethyl acetate/hexanes (1:6) as an eluent and recrystallization  $\text{CHCl}_3/\text{MeOH}$  to afford the purple powder **BuCP** (534 mg, 42%).

$^1\text{H}$  NMR ( $\text{CDCl}_3$ , 400 MHz),  $\delta$ : 10.15–10.33 (m, 2H), 7.04–7.22 (m, 8H), 5.66–5.85 (m, 8H), 5.11–5.37 (m, 4H), 2.58–2.86 (m, 4H), 1.76–2.30 (m, 20H), 1.21–1.40 (m, 6H), -3.13 (s, 2H).

$^{13}\text{C}$  NMR ( $\text{CDCl}_3$ , 100 MHz),  $\delta$ : 151.17, 151.15, 151.11, 146.07, 146.05, 141.31, 141.22, 136.84, 135.72, 135.70, 134.48, 119.01, 95.71, 95.68, 40.69, 40.10, 36.10, 33.20, 28.01, 27.50, 27.15, 23.78, 14.73.

HR-MS (ESI): calcd for  $\text{C}_{52}\text{H}_{55}\text{N}_4$ , 735.4427  $[\text{M} + \text{H}]^+$ ; found, 735.4418.

Thermal conversion of CP- $\text{C}_{60}$  and BuCP to BP- $\text{C}_{60}$  and BuBP was carried out at 200 °C for 1 h in vacuum. Because of their terribly low solubility, BP- $\text{C}_{60}$  and BuBP were identified by thermal gravimetric analysis (Figs. S2 and S4) and MALDI-TOF mass spectrum (Figs. S3 and S5).



## 2. Thermal reaction profiles.

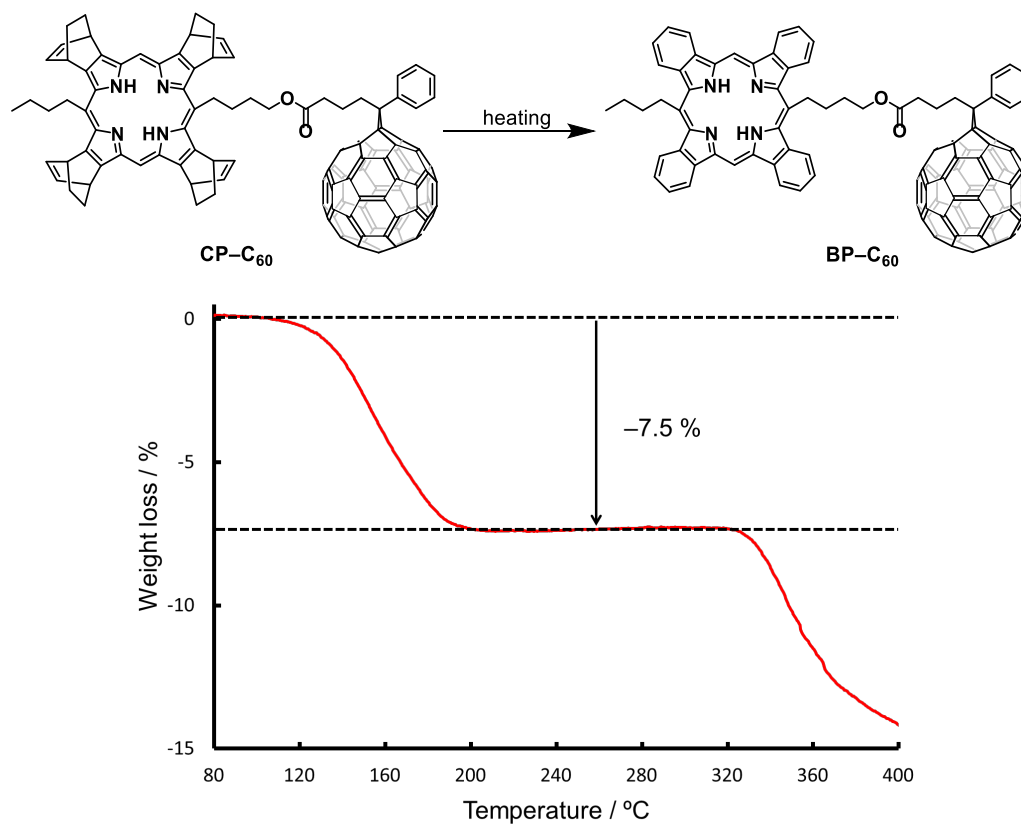

**Fig. S2** Thermal gravimetric analysis of CP-C<sub>60</sub>. The weight loss from 150 to 220 °C was due to the release of four ethylene molecules from CP-C<sub>60</sub>. The observed value was 7.5% and the calculated was 6.9%.

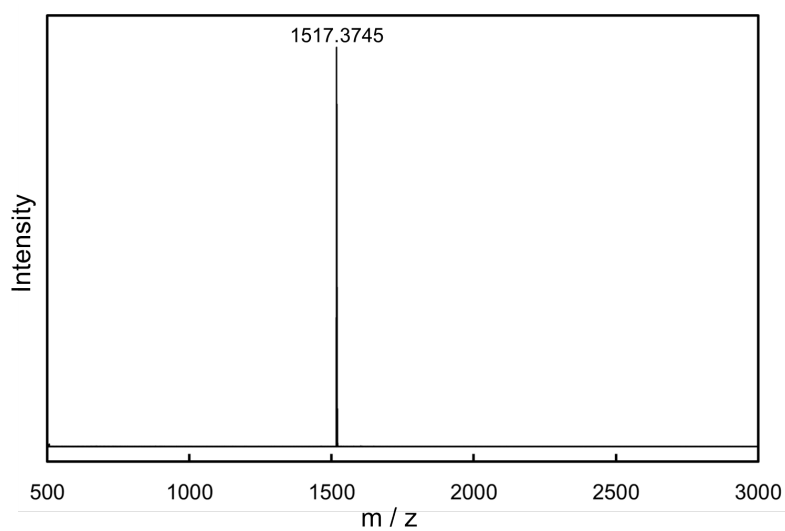

**Fig. S3** MALDI-TOF mass spectrum after thermal reaction of CP-C<sub>60</sub>.

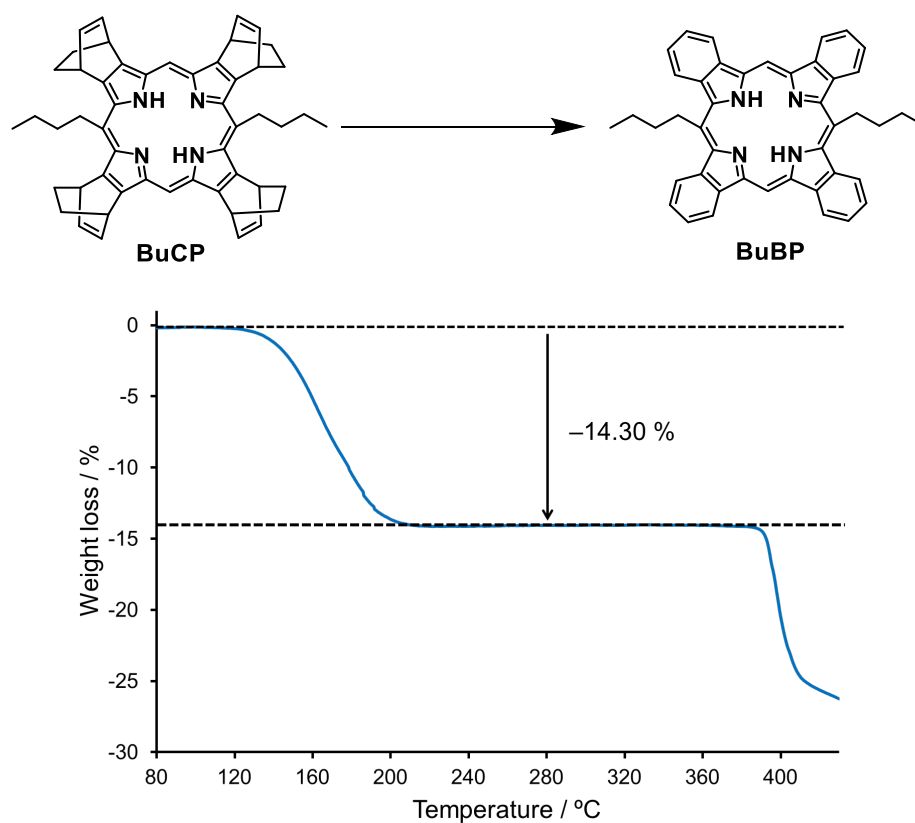

**Fig. S4** Thermal gravimetric analysis of **BuCP**. The weight loss from 150 to 220 °C was due to the release of four ethylene molecules from **BuCP**. The observed value was 14.30%, and the calculated was 15.27%.

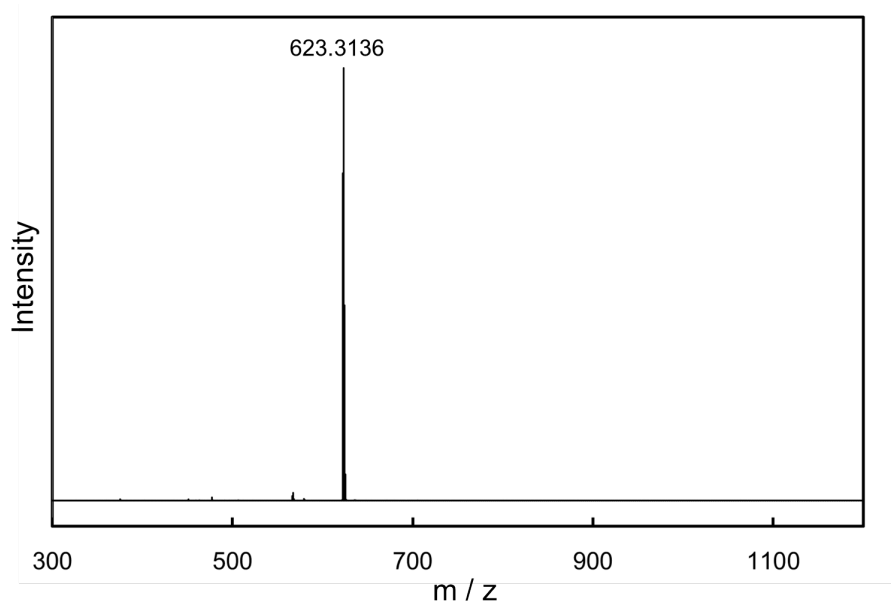

**Fig. S5** MALDI-TOF mass spectrum after thermal reaction of **BuCP**.

### 3. UV-vis absorption spectra and fluorescence spectra

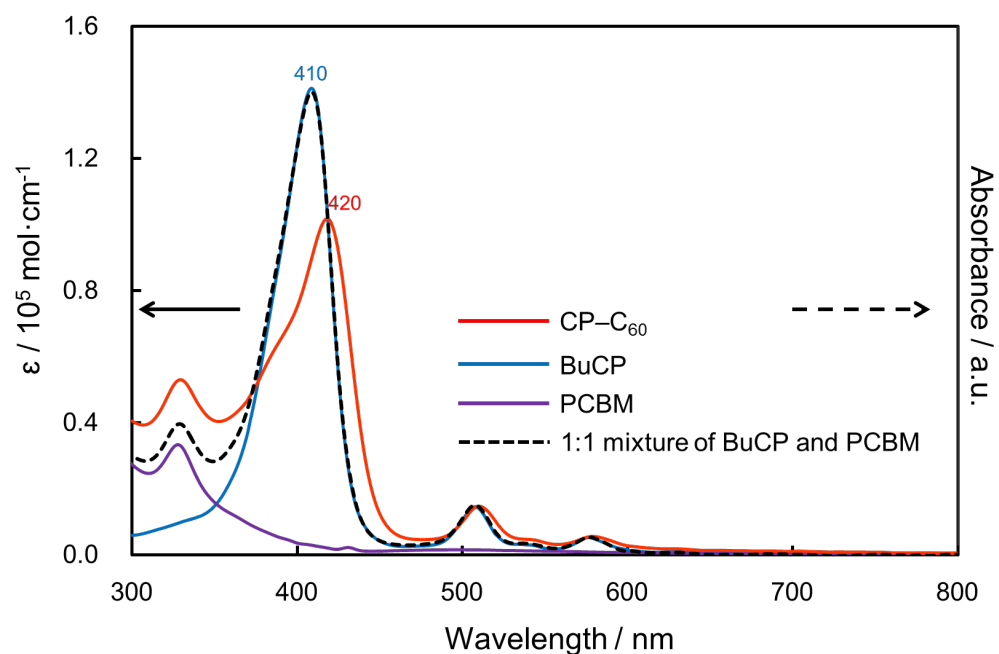

**Fig. S6** The UV-vis absorption spectra of **CP-C<sub>60</sub>**, **BuCP**, **PCBM** and a 1:1 mixture of **BuCP** and **PCBM** in CH<sub>2</sub>Cl<sub>2</sub>.

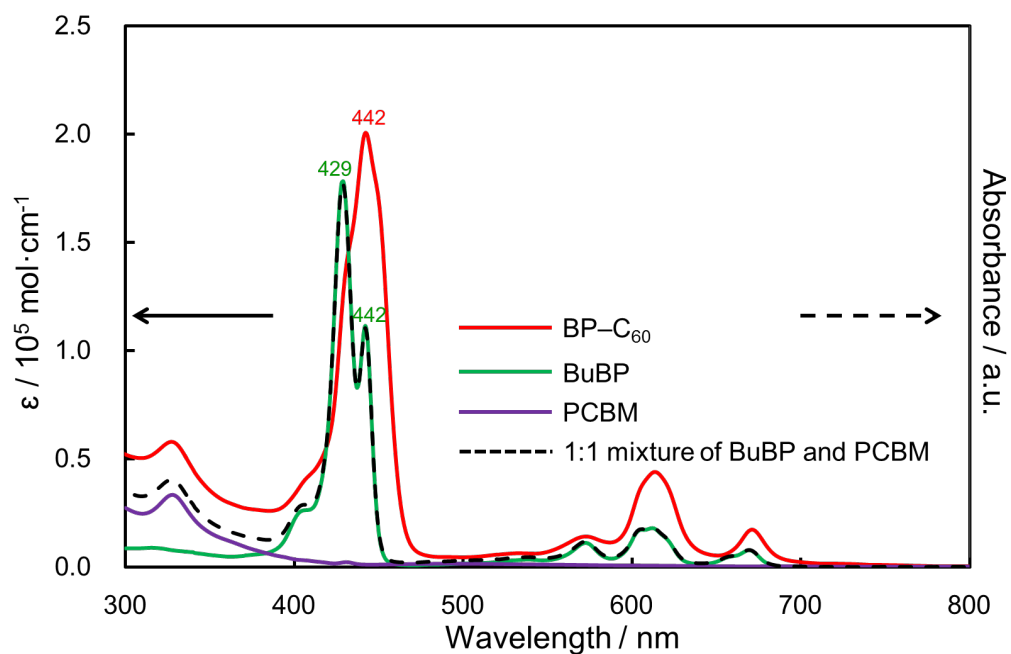

**Fig. S7** UV-vis absorption spectra of **BP-C<sub>60</sub>**, **BuBP**, **PCBM** and a 1:1 mixture of **BuBP** and **PCBM** in CH<sub>2</sub>Cl<sub>2</sub>.

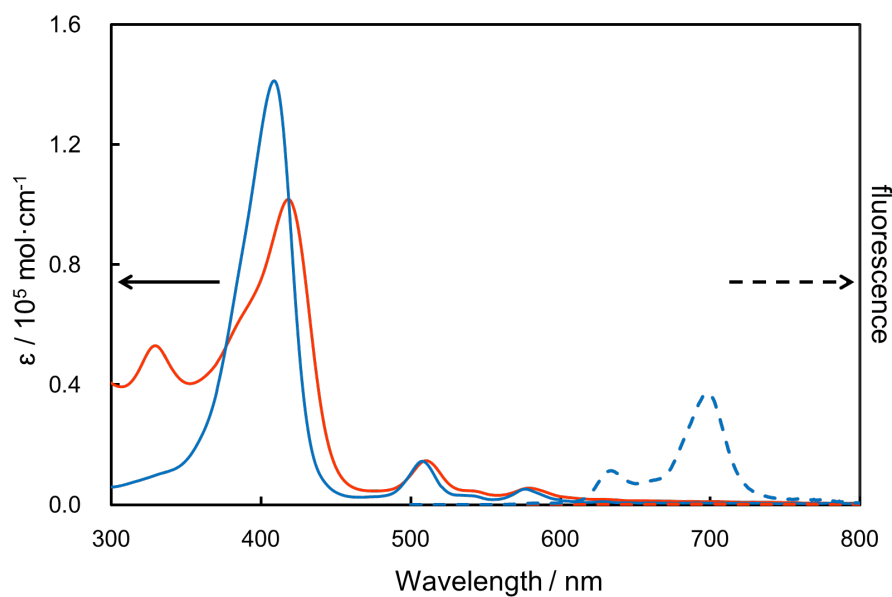

**Fig. S8** The UV-vis absorption (solid lines) and fluorescence spectra (broken lines) of **BuCP** (blue lines) and **CP-C<sub>60</sub>** (orange lines) in CH<sub>2</sub>Cl<sub>2</sub>.

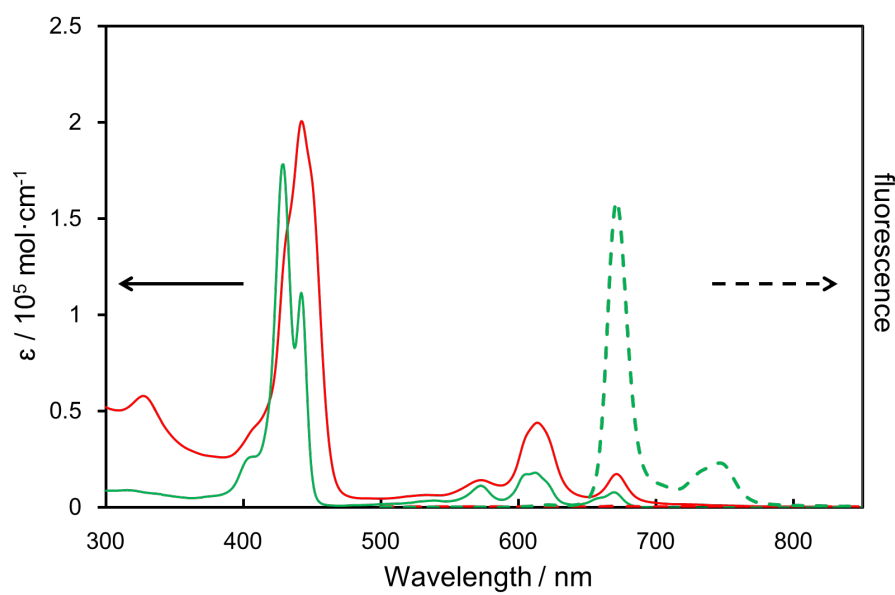

**Fig. S9** The UV-vis absorption (solid lines) and fluorescence spectra (broken lines) of **BuBP** (green lines) and **BP-C<sub>60</sub>** (red lines) in CH<sub>2</sub>Cl<sub>2</sub>.

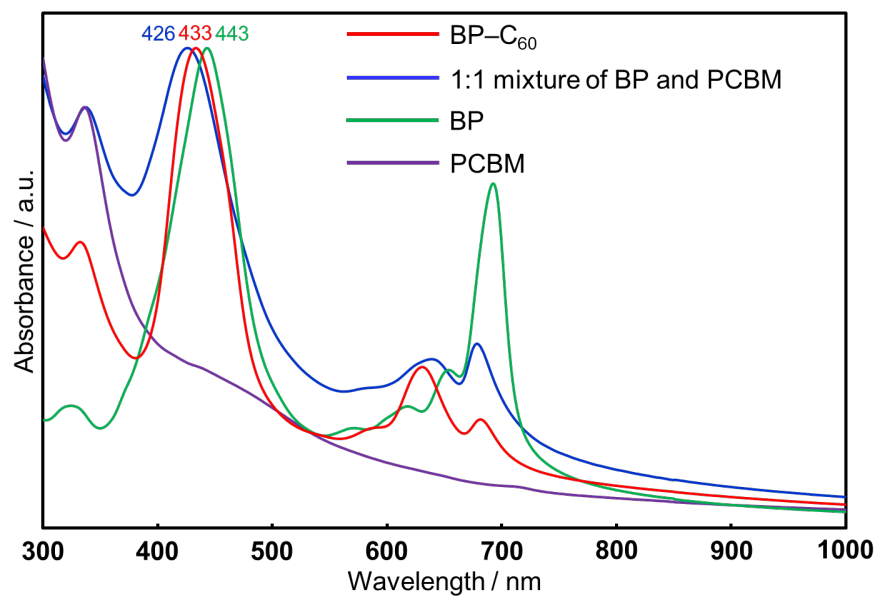

**Fig. S10** Normalized UV-vis absorption spectra of **BP-C<sub>60</sub>**, **BP/PCBM** (1:1 mol/mol) blend, **BP**, and **PCBM** as film.

#### 4. Ionization potential

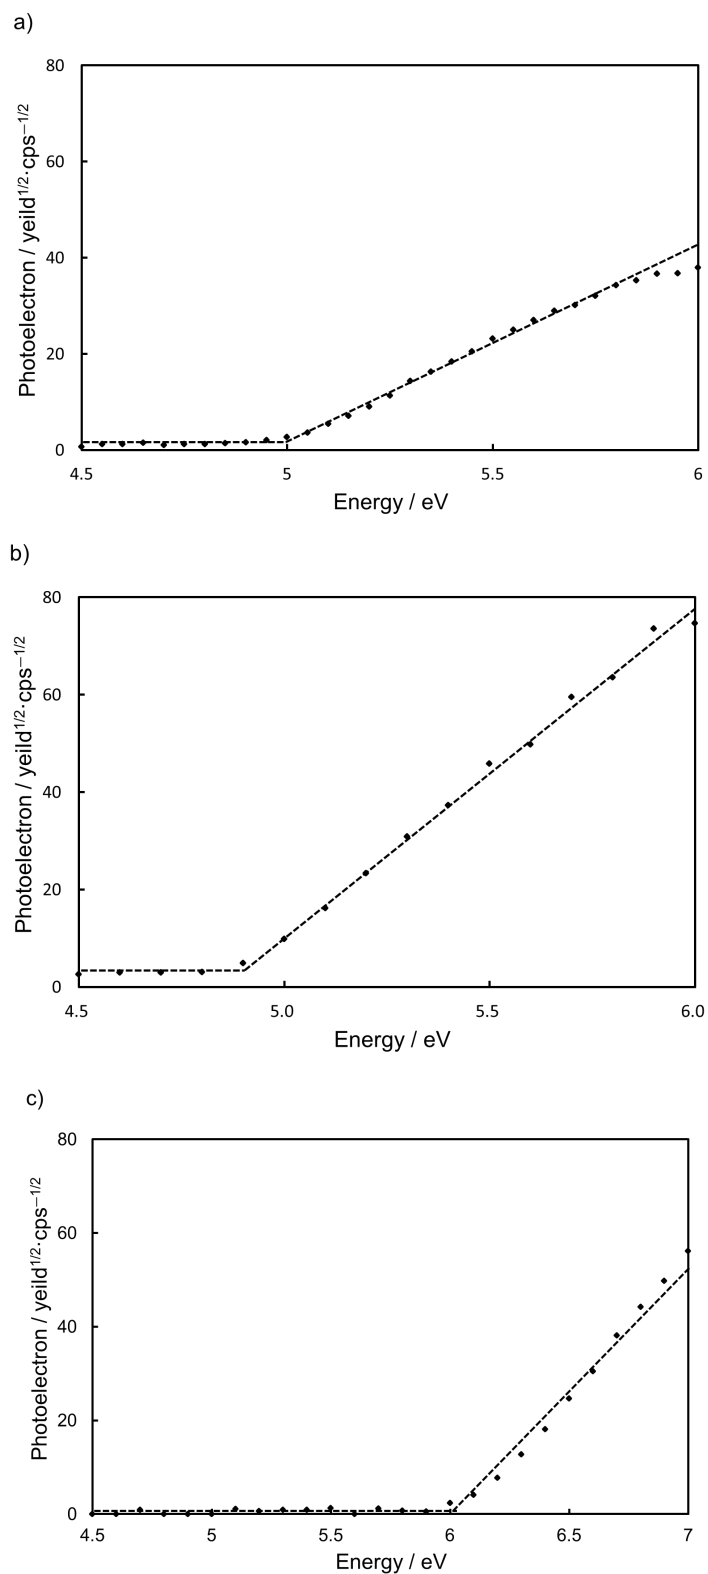

**Fig. S11** Measurement of ionization potential of a) **BP-C<sub>60</sub>**, b) **BP** and c) **PCBM**, films by photoelectron spectroscopy, AC-3. Broken lines are fitting lines.

## 5. Cyclic voltammetry

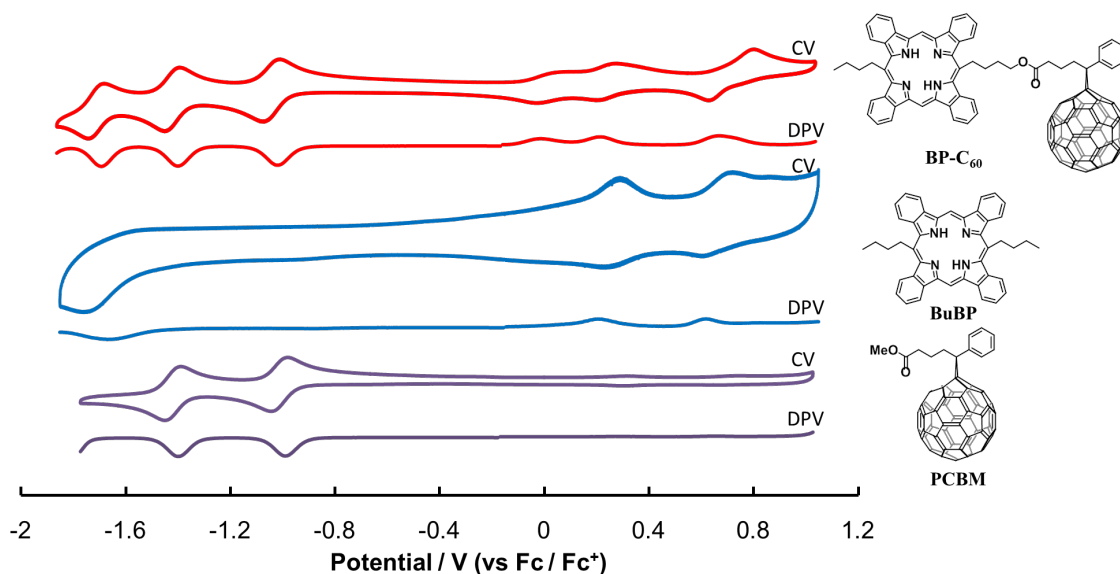

**Fig. S12 a)** Cyclic voltammograms (CVs) and differential pulse voltammograms (DPVs) of **BP-C<sub>60</sub>** (red), **BuBP** (blue) and **PCBM** (purple) in benzonitrile.

**Table. S1** HOMO and LUMO energy level of the materials for OPV

|                    | $E_{\text{gap}}^a$<br>[eV] | $E_{1/2}^{\text{ox}b}$<br>[V] | $E_{1/2}^{\text{red}b}$<br>[V] | HOMO <sup>c</sup><br>[eV] | HOMO <sup>d</sup><br>[eV] | LUMO <sup>e</sup><br>[eV] | LUMO <sup>f</sup><br>[eV] |
|--------------------|----------------------------|-------------------------------|--------------------------------|---------------------------|---------------------------|---------------------------|---------------------------|
| BP-C <sub>60</sub> | 1.6                        | —                             | -0.88                          | -5.0                      | -4.7                      | -3.4                      | -3.9                      |
| BP                 | 1.7                        | —                             | —                              | -4.9                      | —                         | -3.2                      | —                         |
| BuBP               | —                          | 0.2                           | -1.7                           | —                         | -4.6                      | —                         | -3.1                      |
| PCBM               | 1.8                        | —                             | -1.0                           | -6.0                      | —                         | -4.2                      | -3.8                      |

<sup>a</sup>Determined by absorption edge of the film; <sup>b</sup>Determined from the oxidation and reduction peaks obtained by cyclic voltammetry, V vs Fc/Fc<sup>+</sup>; <sup>c</sup>Determined by photoemission yield spectroscopy in air;

<sup>d</sup>HOMO =  $-(4.8 + E_{1/2}^{\text{ox}})$ ; <sup>e</sup>Estimated from  $E_{\text{gap}}$  and HOMO levels. LUMO =  $E_{\text{gap}} + \text{HOMO}$ ; <sup>f</sup>LUMO =  $-(4.8 + E_{1/2}^{\text{red}})$

## 6. Current–voltage measurement

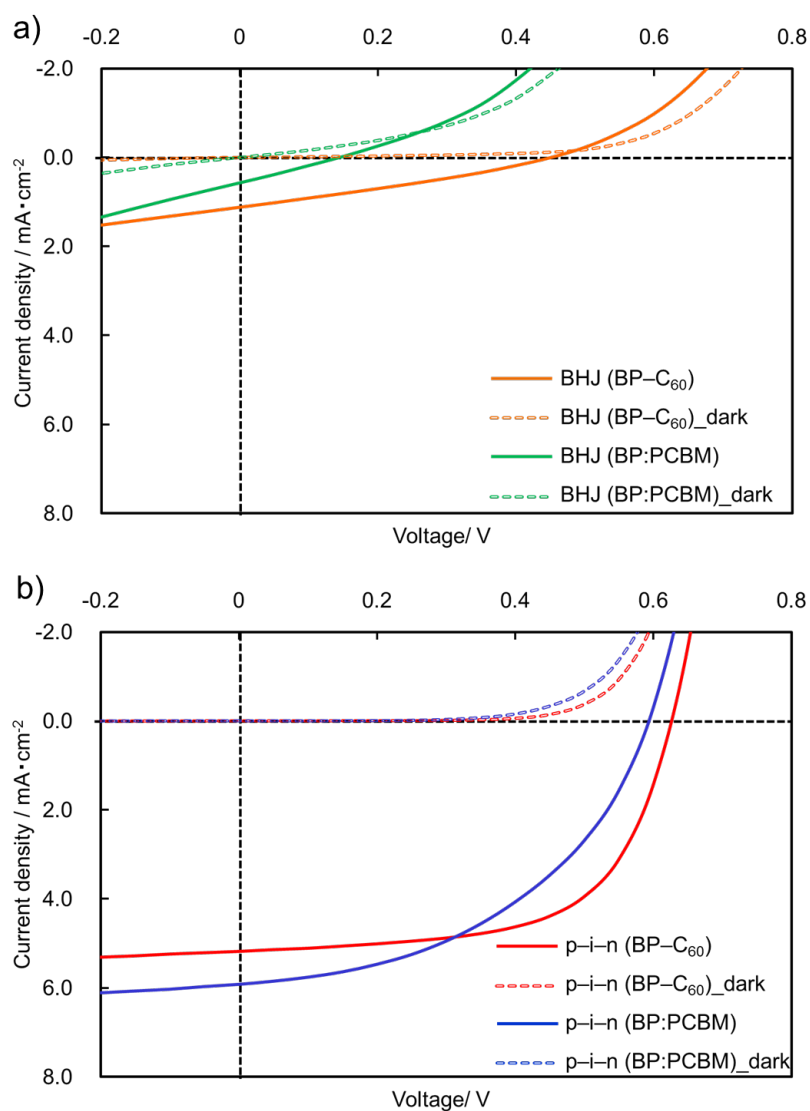

**Fig. S13** The light and dark  $J$ - $V$  characteristics of a) BHJ devices and b) p-i-n devices.



## 7. AFM

a)

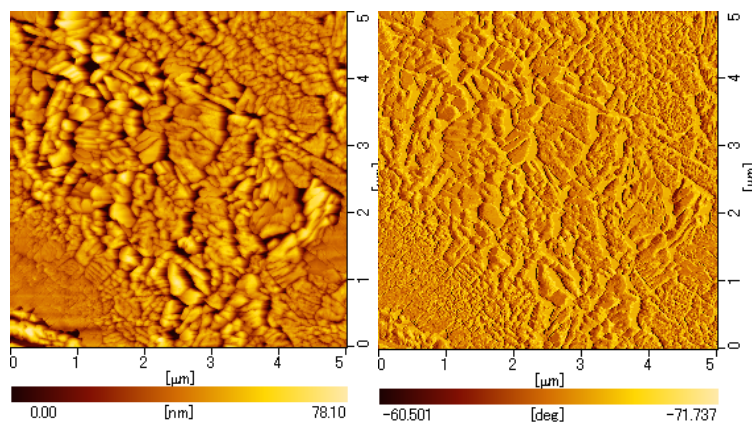

b)

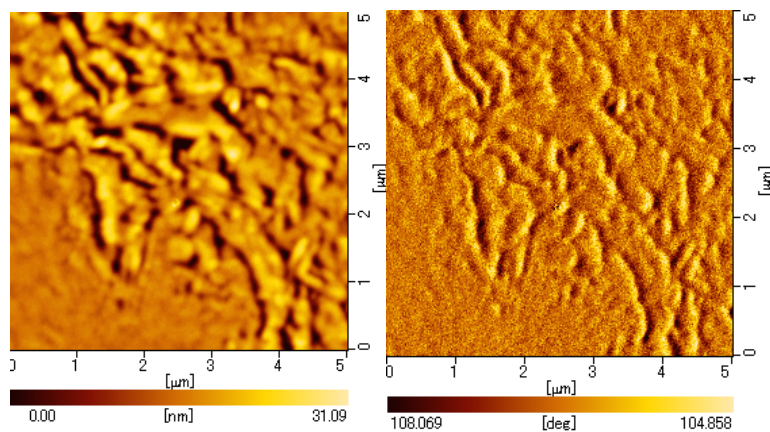

c)

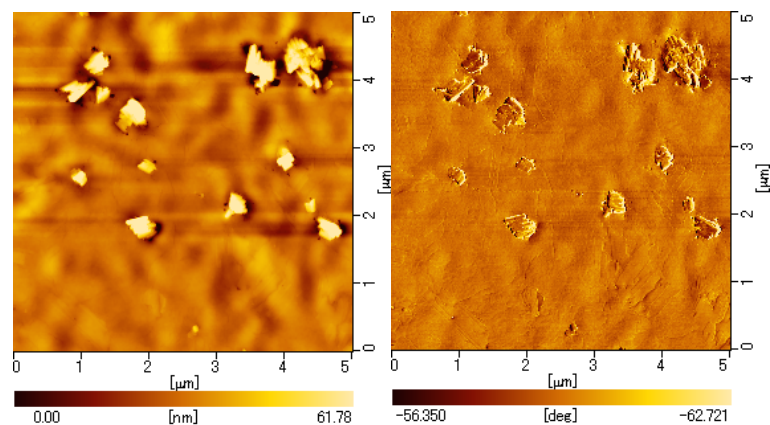

**Fig. S14** Tapping-mode AFM height (left) and phase (right) images of a) **BP**-layer, b) **BP-C<sub>60</sub>** -layer on **BP** layer and c) a mixed **BP:PCBM**-layer on **BP** layer. RMS values are 12.4, 4.88 and 8.83 nm for a), b), and c).

a)

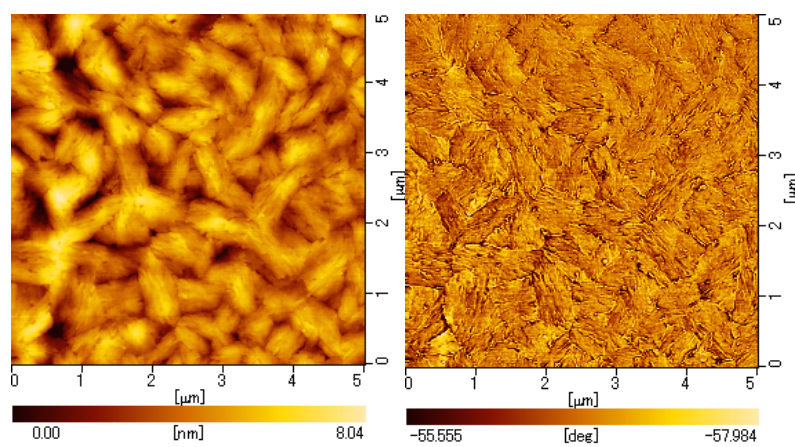

b)

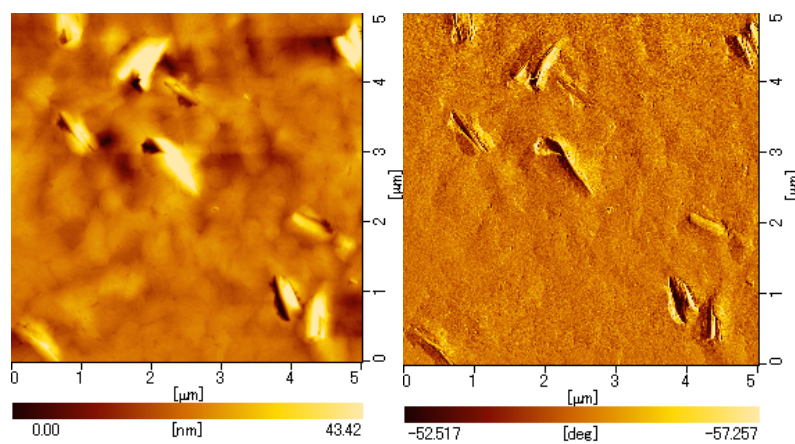

**Fig. S15** Tapping-mode AFM height (left) and phase (right) images of **PCBM**-layers on p-i-layer with a) **BP-C<sub>60</sub>** for i-layer and b) **BP:PCBM** for i-layer. RMS values are 1.23 and 6.42 nm for a) and b).

**8. XRD**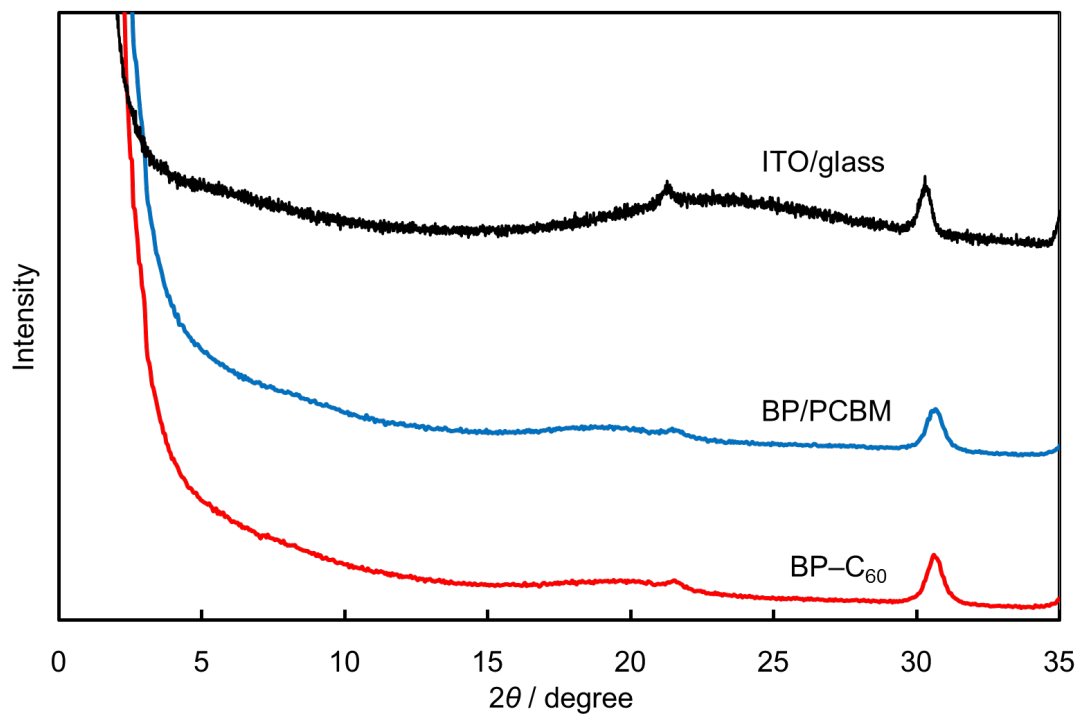

**Fig. S16** Out-of-plane XRD patterns of **BP-C<sub>60</sub>** layer and **BP/PCBM** layer on top of glass/ITO/PEDOT:PSS.

## 6. Characterization of compounds

$^1\text{H}$  NMR spectrum ( $\text{CDCl}_3$ ) of **4**

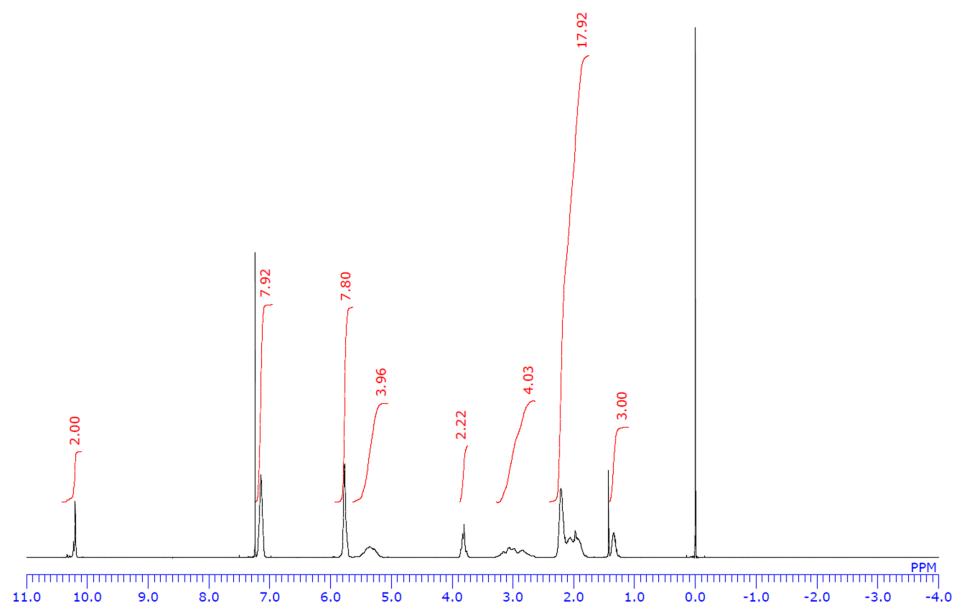

$^{13}\text{C}$  NMR spectrum ( $\text{CDCl}_3$ ) of **4**. (Minor peaks are occasionally observed alongside of the main peaks, which are presumably from the structural isomers differing in the orientation of bicycle[2.2.2]octadieno-units. The minor peaks are also listed in the spectroscopic characterization data above.)

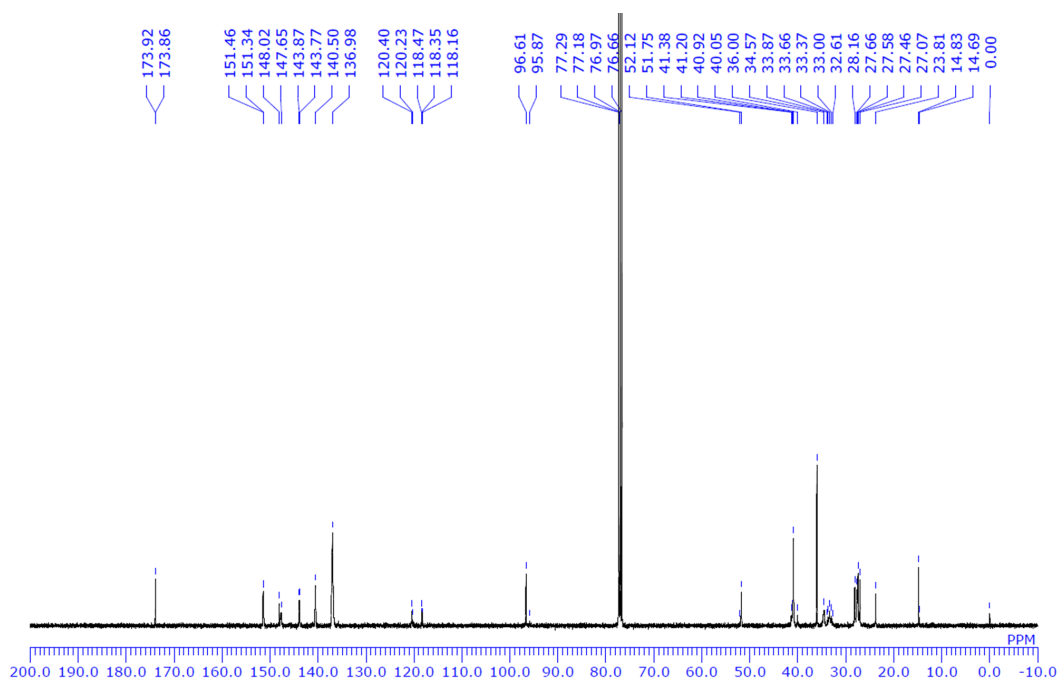

$^{13}\text{C}$  NMR spectrum ( $\text{CDCl}_3$ ) of **4** (0.0–60 ppm).

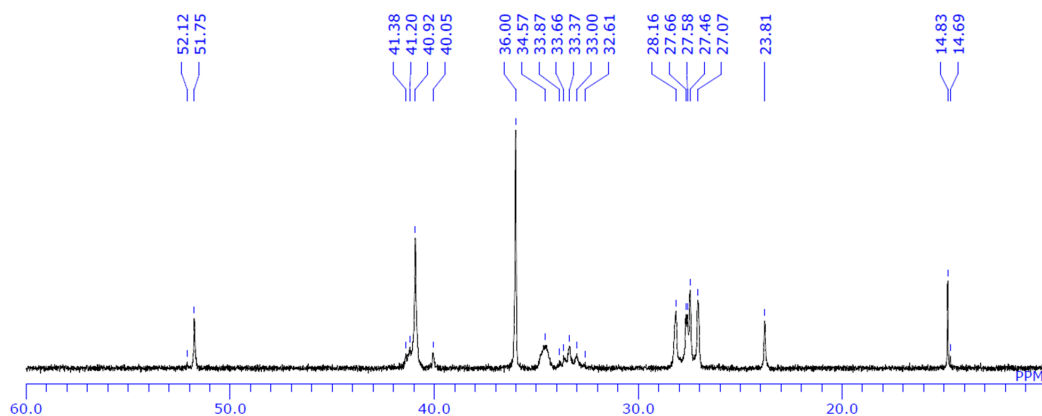

$^{13}\text{C}$  NMR spectrum ( $\text{CDCl}_3$ ) of **4** (90.0–130.0 ppm)

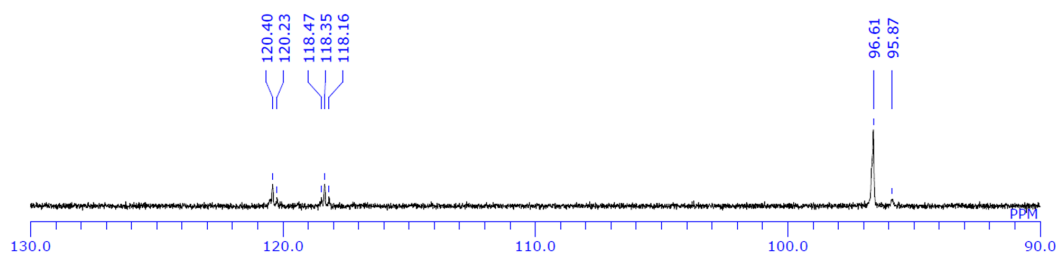

$^{13}\text{C}$  NMR spectrum ( $\text{CDCl}_3$ ) of **4** (130.0–180.0 ppm)

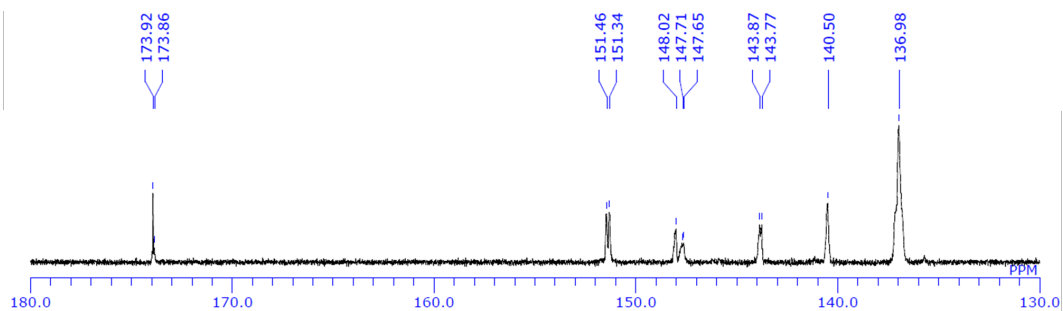

$^1\text{H}$  NMR spectrum ( $\text{CDCl}_3$ ) of **5**

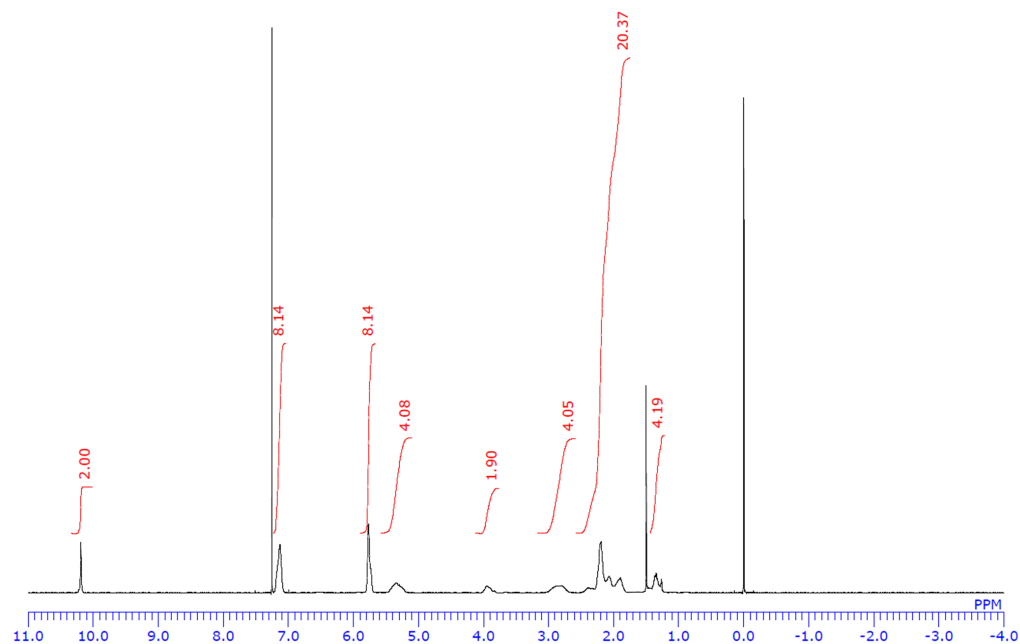

$^{13}\text{C}$  NMR spectrum ( $\text{CDCl}_3$ ) of **5**. (Minor peaks are occasionally observed alongside of the main peaks, which are presumably from the structural isomers differing in the orientation of bicycle[2.2.2]octadieno-units. The minor peaks are also listed in the spectroscopic characterization data above.)

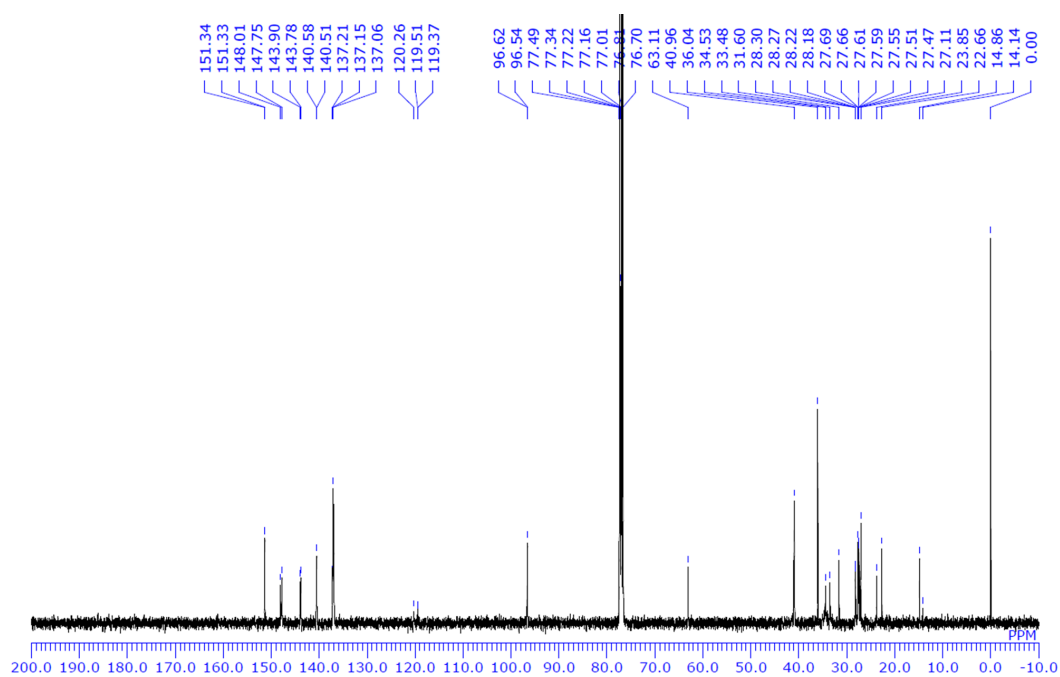

$^{13}\text{C}$  NMR spectrum ( $\text{CDCl}_3$ ) of **5** (0.0–70 ppm)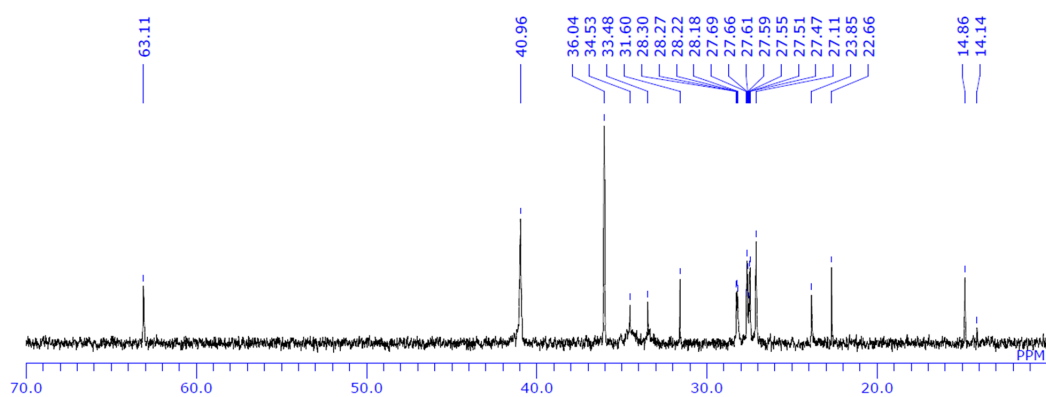 $^{13}\text{C}$  NMR spectrum ( $\text{CDCl}_3$ ) of **5** (0.0–70 ppm)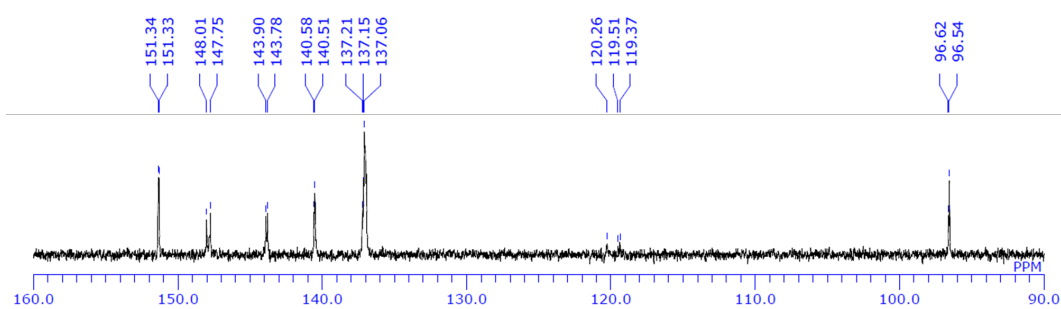 $^1\text{H}$  NMR spectrum ( $\text{CDCl}_3$ ) of **ZnCP-C<sub>60</sub>**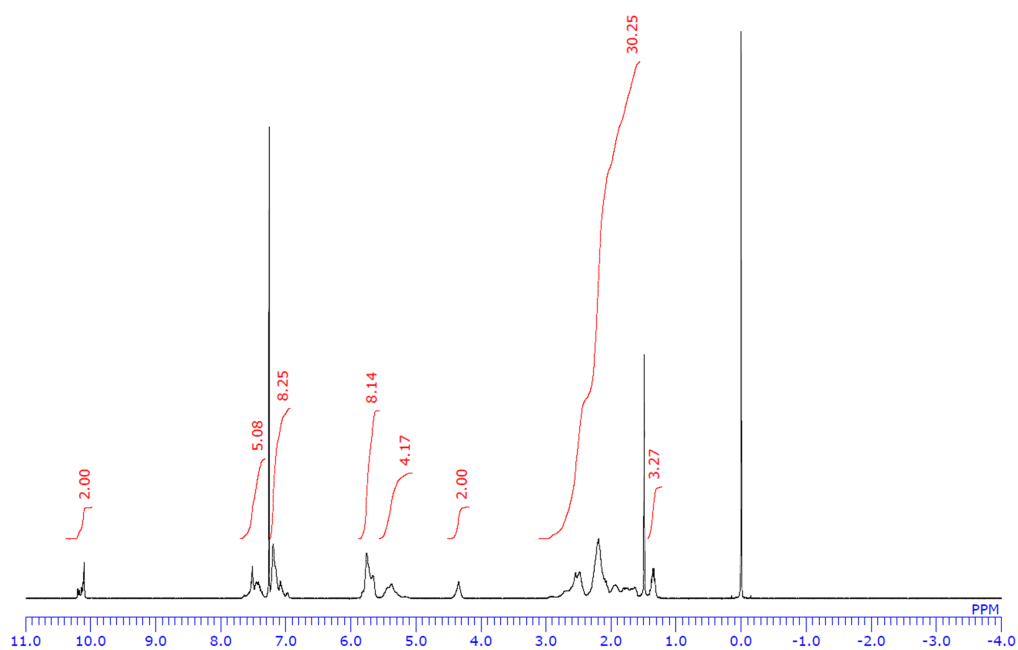

$^{13}\text{C}$  NMR spectrum ( $\text{CDCl}_3$ ) of **ZnCP-C<sub>60</sub>**. (Minor peaks and peak broadening are observed, presumably because of the intra- or intermolecular interactions between the C<sub>60</sub> core and the porphyrin unit, associated with the existence of structural isomers differing in the orientation of bicycle[2.2.2]octadieno-units. The minor peaks are also listed in the spectroscopic characterization data above.)

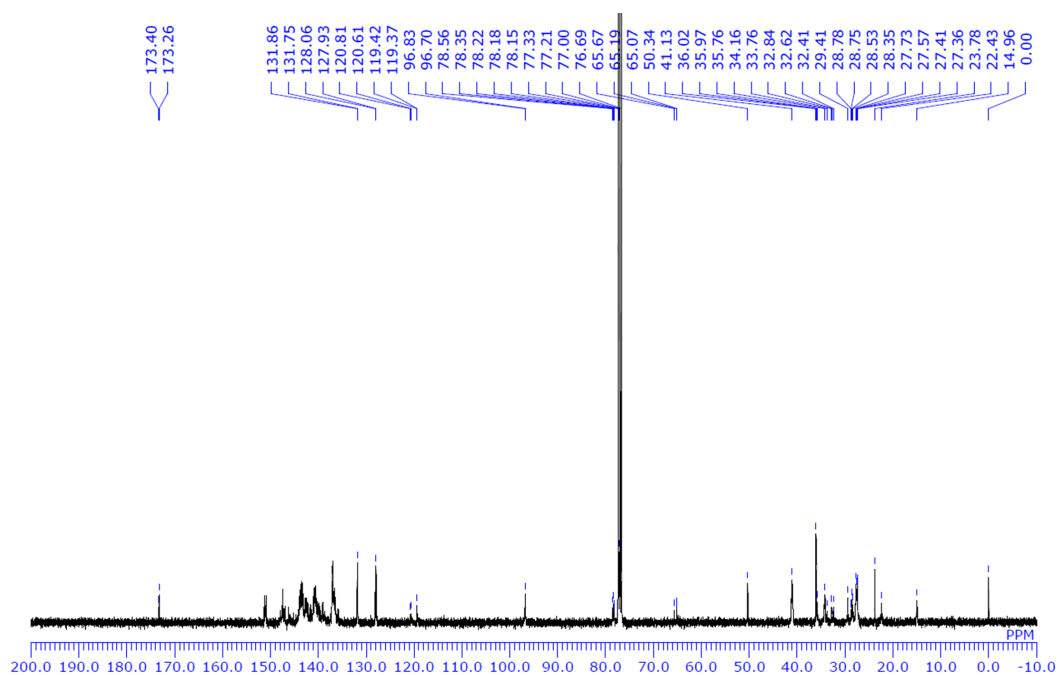

$^{13}\text{C}$  NMR spectrum ( $\text{CDCl}_3$ ) of **ZnCP-C<sub>60</sub>** (10.0–70.0 ppm)

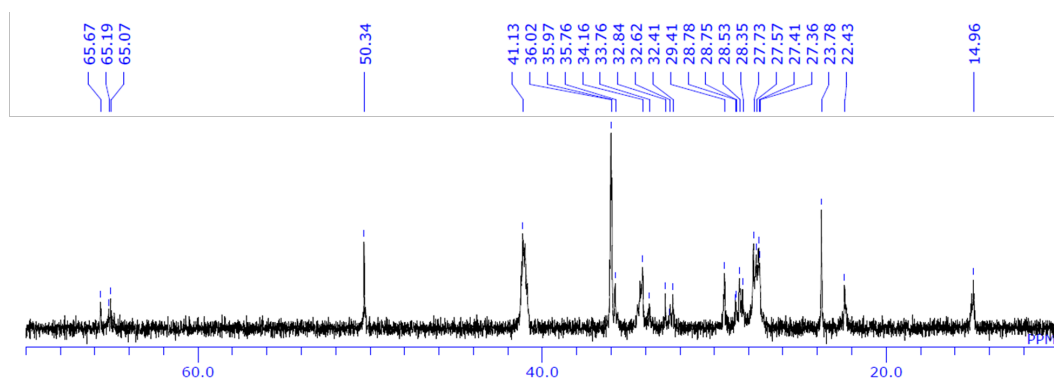



$^{13}\text{C}$  NMR spectrum ( $\text{CDCl}_3$ ) of **ZnCP-C<sub>60</sub>** (75.0–125.0 ppm)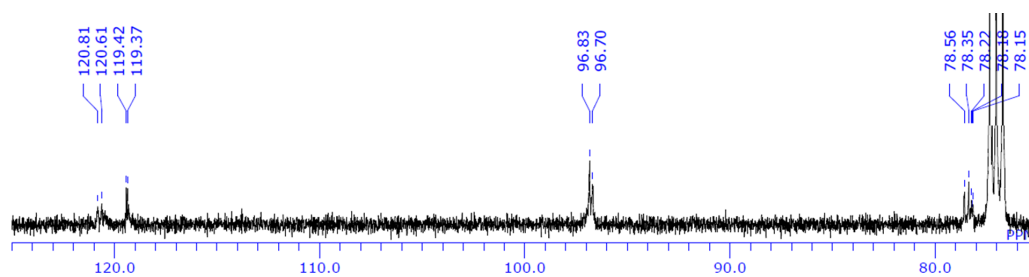 $^{13}\text{C}$  NMR spectrum ( $\text{CDCl}_3$ ) of **ZnCP-C<sub>60</sub>** (125.0–180.0 ppm)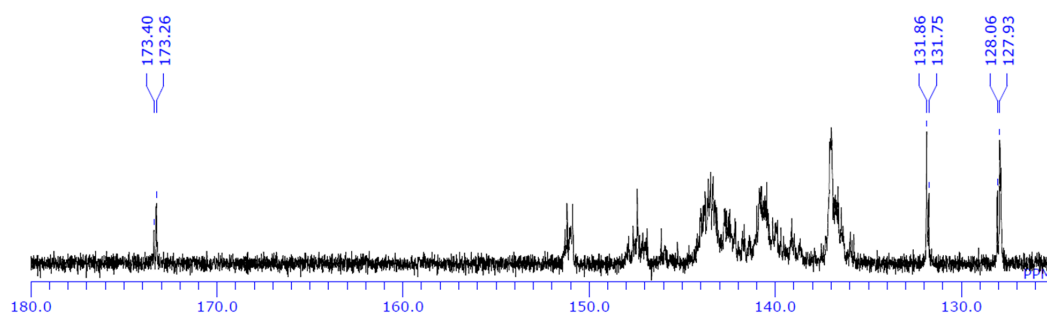 $^1\text{H}$  NMR spectrum ( $\text{CDCl}_3$ ) of **CP-C<sub>60</sub>**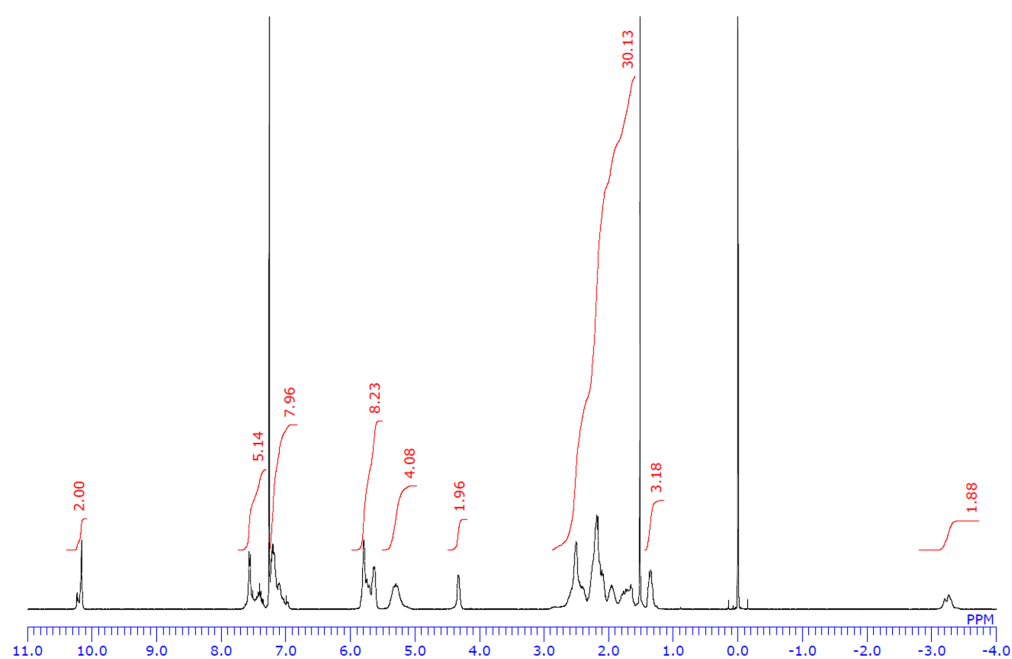

$^{13}\text{C}$  NMR spectrum ( $\text{CDCl}_3$ ) of **CP-C<sub>60</sub>**. (Minor peaks and peak broadening are observed, presumably because of the intra- or intermolecular interactions between the C<sub>60</sub> core and the porphyrin unit, associated with the existence of structural isomers differing in the orientation of bicycle[2.2.2]octadieno-units. The minor peaks are also listed in the spectroscopic characterization data above.)

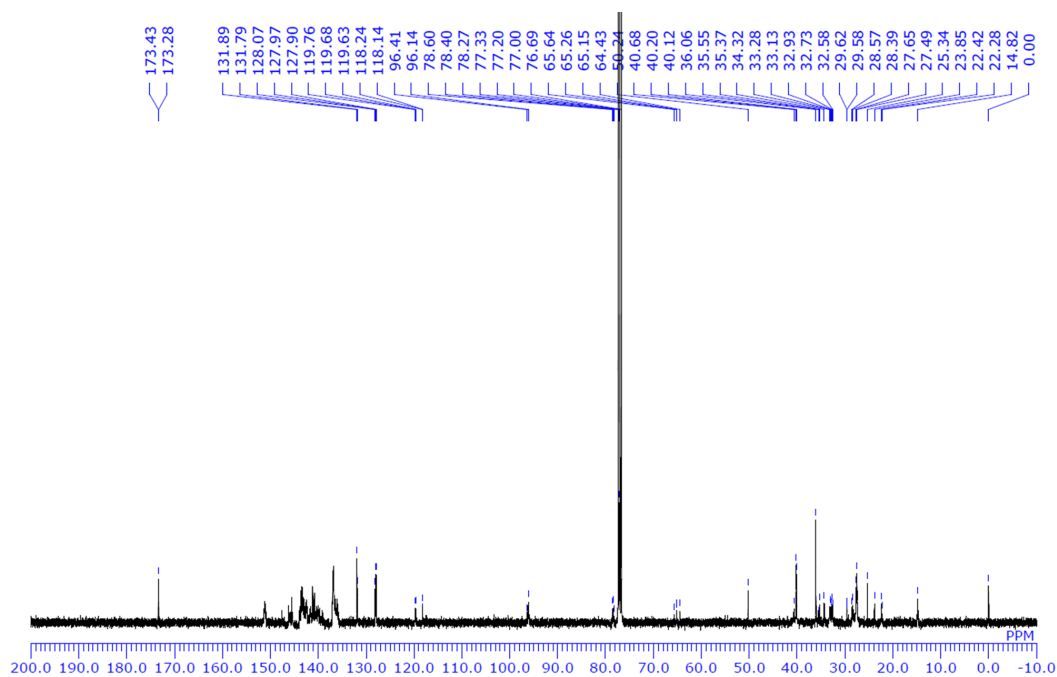

$^{13}\text{C}$  NMR spectrum ( $\text{CDCl}_3$ ) of **CP-C<sub>60</sub>** (10.0–70.0 ppm)

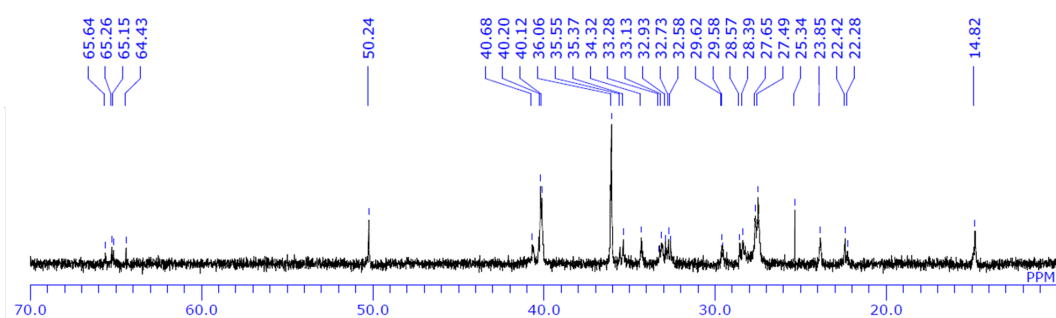

$^{13}\text{C}$  NMR spectrum ( $\text{CDCl}_3$ ) of **CP-C<sub>60</sub>** (75.0–125.0 ppm)

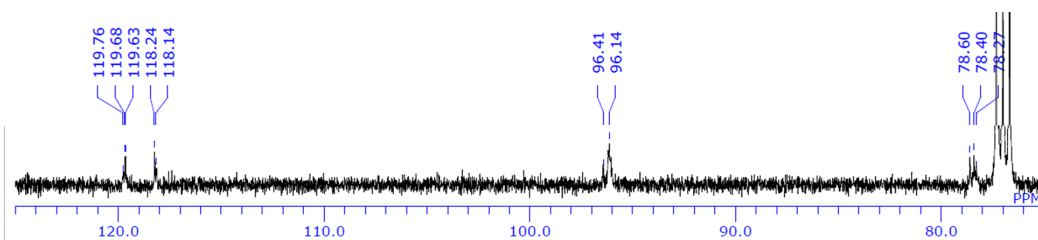

$^{13}\text{C}$  NMR spectrum ( $\text{CDCl}_3$ ) of **CP-C<sub>60</sub>** (125.0–180.0 ppm)

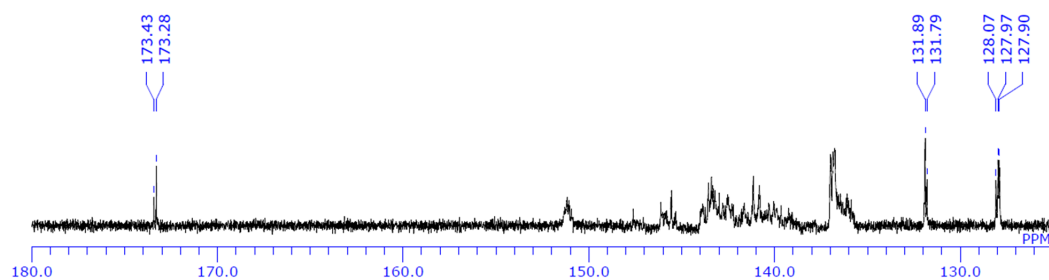

$^1\text{H}$  NMR spectrum ( $\text{CDCl}_3$ ) of **BuCP**

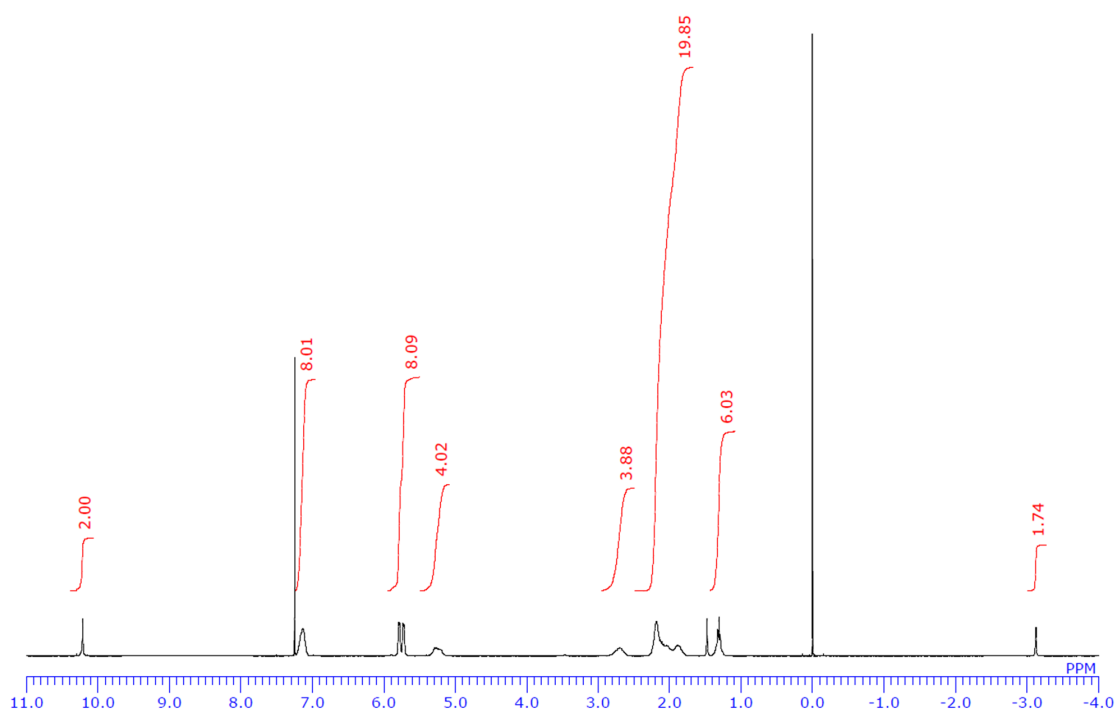

$^{13}\text{C}$  NMR spectrum ( $\text{CDCl}_3$ ) of **BuCP**. (Minor peaks are occasionally observed alongside of the main peaks, which are presumably from the structural isomers differing in the orientation of bicycle[2.2.2]octadieno-units. The minor peaks are also listed in the spectroscopic characterization data above.)

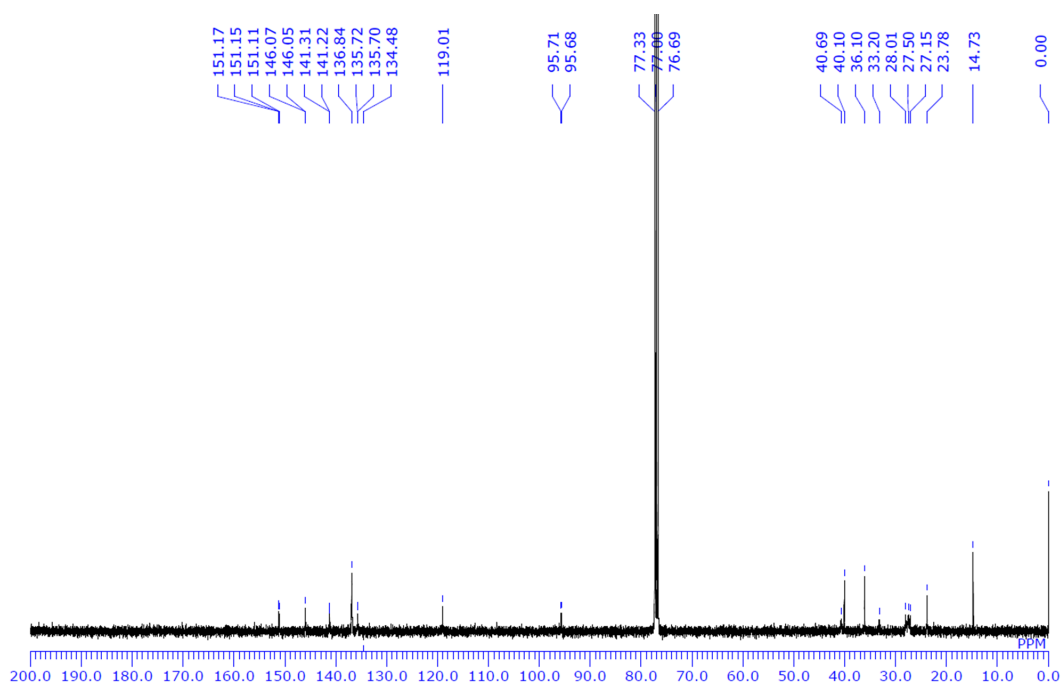

$^{13}\text{C}$  NMR spectrum ( $\text{CDCl}_3$ ) of **BuCP** (0.0–50.0 ppm)

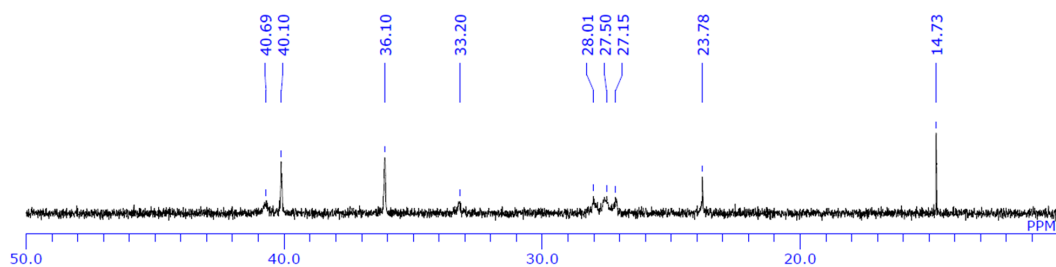

$^{13}\text{C}$  NMR spectrum ( $\text{CDCl}_3$ ) of **BuCP** (90–125 ppm)

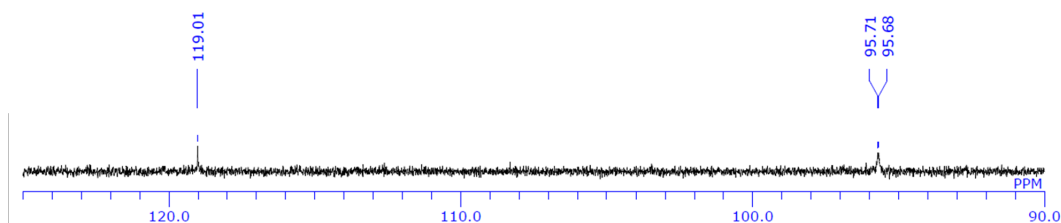

$^{13}\text{C}$  NMR spectrum ( $\text{CDCl}_3$ ) of **BuCP** (130–160 ppm)

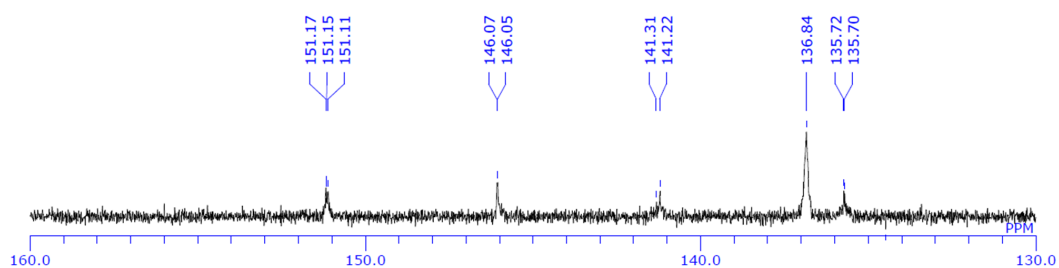

**Reference**

1. H. Yamada, K. Kishibe, T. Okujima, H. Uno, N. Ono, *Chem Commun.*, 2006, 383-385
2. V. Hickmann, A. Kondoh, B. Gabor, M. Alcarazo and A. Fürstner, *J. Am. Chem. Soc.* 2011, **133**, 13471.
3. T. Nishizawa, K. Tajima, K. Hashimoto, *J. Mater. Chem.*, 2007, **17**, 2440-2445
